# Supplementary material for: Activation of peroxisome proliferator-activated receptor-alpha stimulates both differentiation and fatty acid oxidation in adipocytes
Source: PubMed Central journal article supplement — J Lipid Res. 2011 May;52(5):873–84. doi: 10.1194/jlr.M011320 (PMC3073464; doi:10.1194/jlr.m011320), 2011-05
Supplement: supp_M011320_Goto_et_al_Supplemental_Tables.pdf [file supp_M011320_Goto_et_al_Supplemental_Tables.pdf]

**Supplemental Table 1.** Effects of bezafibrate treatment for 4 weeks on weight of body and several tissues in KK mice fed a HFD.

|                                    | Control     | Beza           |
|------------------------------------|-------------|----------------|
| Body weight (g)                    | 34.6 ± 0.33 | 30.7 ± 0.66**  |
| Epididymal WAT (g / 100 g BW)      | 4.01 ± 0.15 | 2.26 ± 0.12**  |
| Perireanal WAT (g / 100 g BW)      | 1.88 ± 0.07 | 1.08 ± 0.04**  |
| Mesenteric WAT (g / 100 g BW)      | 1.93 ± 0.11 | 1.00 ± 0.08**  |
| Intraperitoneal WAT (g / 100 g BW) | 7.83 ± 0.29 | 4.34 ± 0.17**  |
| Liver (g / 100 g BW)               | 4.32 ± 0.66 | 11.64 ± 0.18** |
| Kidney (g / 100 g BW)              | 1.26 ± 0.05 | 1.50 ± 0.02**  |
| Spleen (g / 100 g BW)              | 0.29 ± 0.02 | 0.34 ± 0.03    |
| Interscapular BAT (g / 100 g BW)   | 0.57 ± 0.04 | 0.41 ± 0.04*   |

BAT, brown adipose tissue

Values are means ± SEM of 5-6 mice per group.

\*  $P < 0.05$ , \*\*  $P < 0.01$  compared with control diet group.

**Supplemental Table 2.** Effects of bazedapril treatment for 6 weeks on weight of body and several tissues in WT and PPAR $\alpha$  (-/-) mice fed a HFD.

|                                    | WT              |                               | PPAR $\alpha$ (-/-)           |                                |
|------------------------------------|-----------------|-------------------------------|-------------------------------|--------------------------------|
|                                    | Control         | Beza                          | Control                       | Beza                           |
| Body weight (g)                    | 27.6 $\pm$ 1.17 | 26.4 $\pm$ 0.48               | 28.7 $\pm$ 1.07               | 28.9 $\pm$ 0.93                |
| Epididymal WAT (g / 100 g BW)      | 3.21 $\pm$ 0.30 | 2.30 $\pm$ 0.11 <sup>**</sup> | 3.64 $\pm$ 0.39               | 3.70 $\pm$ 0.17 <sup>††</sup>  |
| Perireanal WAT (g / 100 g BW)      | 1.13 $\pm$ 0.12 | 0.66 $\pm$ 0.04 <sup>**</sup> | 1.25 $\pm$ 0.11               | 1.34 $\pm$ 0.03 <sup>††</sup>  |
| Mesenteric WAT (g / 100 g BW)      | 1.26 $\pm$ 0.09 | 0.84 $\pm$ 0.06 <sup>**</sup> | 1.25 $\pm$ 0.10               | 1.23 $\pm$ 0.09 <sup>††</sup>  |
| Intraperitoneal WAT (g / 100 g BW) | 5.60 $\pm$ 0.50 | 3.80 $\pm$ 0.19 <sup>**</sup> | 6.14 $\pm$ 0.56               | 6.26 $\pm$ 0.23 <sup>††</sup>  |
| Inguinal WAT (g / 100 g BW)        | 1.55 $\pm$ 0.14 | 1.09 $\pm$ 0.05 <sup>**</sup> | 1.43 $\pm$ 0.11               | 1.50 $\pm$ 0.07 <sup>††</sup>  |
| Liver (g / 100 g BW)               | 3.37 $\pm$ 0.04 | 7.82 $\pm$ 0.15 <sup>**</sup> | 5.79 $\pm$ 0.17 <sup>††</sup> | 6.38 $\pm$ 0.12 <sup>*††</sup> |
| Kidney (g / 100 g BW)              | 1.26 $\pm$ 0.04 | 1.59 $\pm$ 0.02 <sup>**</sup> | 1.32 $\pm$ 0.05               | 1.26 $\pm$ 0.03 <sup>††</sup>  |
| Spleen (g / 100 g BW)              | 0.19 $\pm$ 0.01 | 0.21 $\pm$ 0.01               | 0.22 $\pm$ 0.01               | 0.27 $\pm$ 0.06                |
| Intrascapular BAT (g / 100 g BW)   | 0.31 $\pm$ 0.01 | 0.31 $\pm$ 0.03               | 0.32 $\pm$ 0.01               | 0.30 $\pm$ 0.02                |

BAT, brown adipose tissue

Values are means  $\pm$  SEM of 5-6 mice per group.

\*  $P < 0.05$ , \*\*  $P < 0.01$  compared with control diet group. ††  $P < 0.01$  compared with WT mice fed the same diet.
