# Supplementary material for: Activation of peroxisome proliferator-activated receptor-alpha stimulates both differentiation and fatty acid oxidation in adipocytes
Source: PubMed Central journal article supplement — J Lipid Res. 2011 May;52(5):873–84. doi: 10.1194/jlr.M011320 (PMC3073464; doi:10.1194/jlr.m011320), 2011-05

## SUPPLEMENTAL FIGURE LEGENDS

**Supplemental Fig. 1. Tissue distribution of PPAR $\alpha$  mRNA expression in mouse.** 8 week old male C57BL/6 mice received standard diet were harvested various tissues for RNA isolation. A, B: mRNA expression levels of murine PPAR $\alpha$  in various tissues (epididymal (Epi), perirenal (Ren), mesenteric (Mes), inguinal (Ing) WAT, spleen (Spl), brown adipose tissue (BAT), skeletal muscle (Mus), testis (Tes), kidney (Kid), Liver (Liv), lung (Lun), brain (Bra), and pancreas) of mice. To visualize and quantify mRNA expression levels of PPAR $\alpha$ , semiquantitative PCR (A) and real-time PCR (B) was performed, respectively. C: mRNA expression levels of murine PPAR $\alpha$  in epididymal WAT. Stromal-vascular cells (SV) and adipocytes (Adipo) from epididymal WAT were prepared as described in Materials and Methods. After the preparation, real-time PCR was performed. Data are means  $\pm$  S.E.M. (n = 3-4).

**Supplemental Fig. 2. The effects of dietary PPAR $\alpha$  activator on whole body energy expenditure.** A, B: 5-week-old male KK mice were fed HFD (Cont) or HFD containing 0.2% bezafibrate (Beza) for 5 weeks. Oxygen consumption rate (OCR) (A) and respiratory exchange ratio (RER) (B) of mice under the fed condition were measured using an indirect calorimetric system every 9 min for 20 h. The measurements started at 9:00 p.m. and ended at 6:00 p.m. (both the dark and light phases were 10 h).

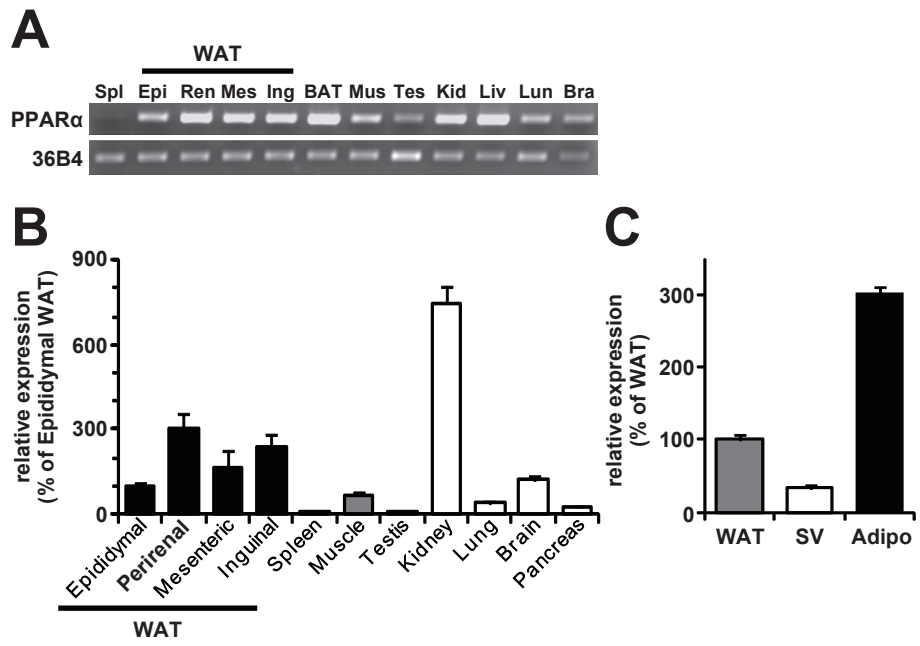

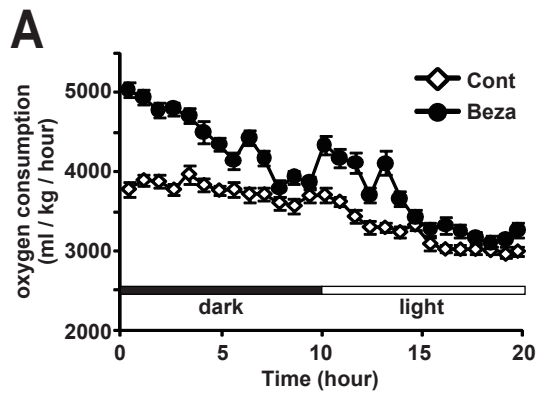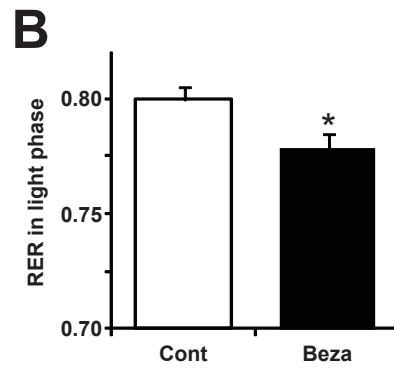

Supplement: supp_M011320_jlr.M011320-1.pdf [file supp_M011320_jlr.M011320-1.pdf]
